# Supplementary material
Source: MDPI journal article supplement (https://www.mdpi.com/2072-4292/9/9/865)
Supplement: s1 [file s1]

## Supplementary Material: The Combined Use of Remote Sensing and Social Sensing Data in the Fine-grained Urban Land Use Mapping: A Case Study in Beijing, China

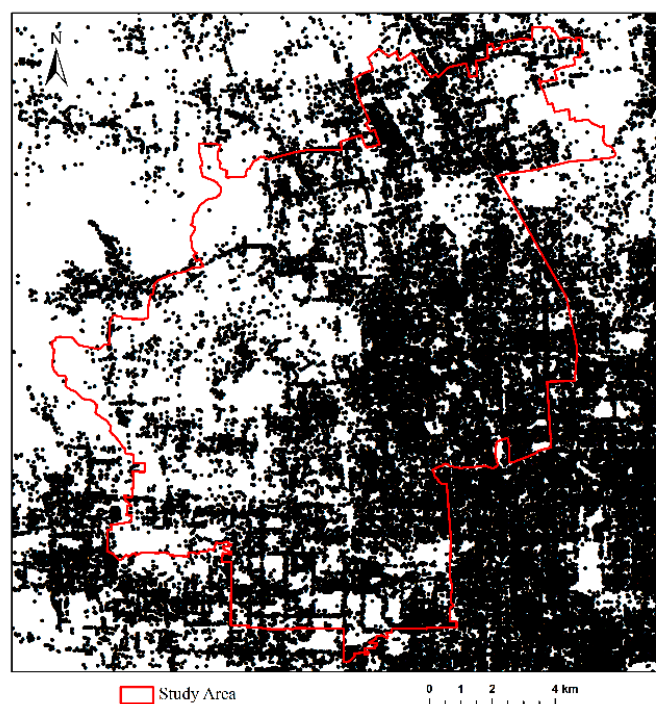

**Figure S1.** All Baidu POIs within the study area of urban Haidian District.

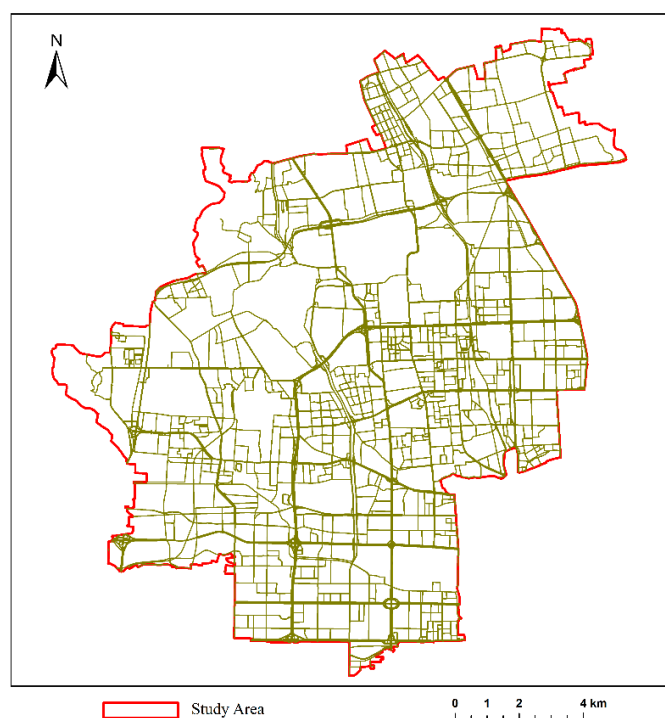

**Figure S2.** Preprocessed OpenStreetMap road network within the study are of urban Haidian District.

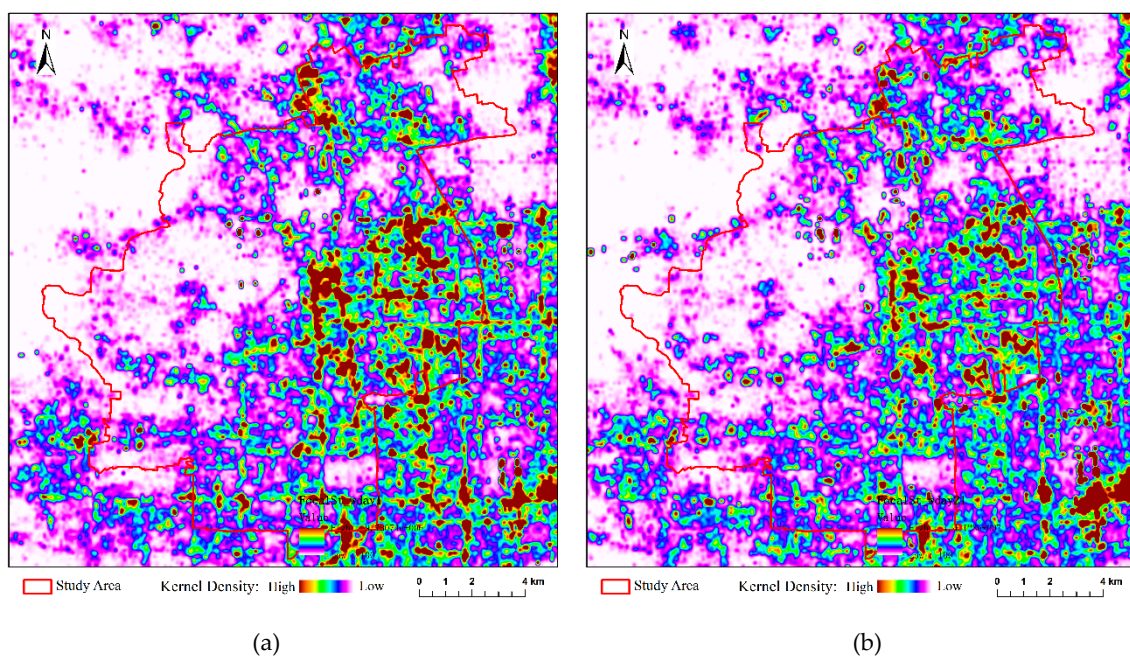

**Figure S3.** The kernel density of Weibo posts during 9:00-12:00 (a) and 21:00-24:00 (b) on weekdays within the study area of urban Haidian District.

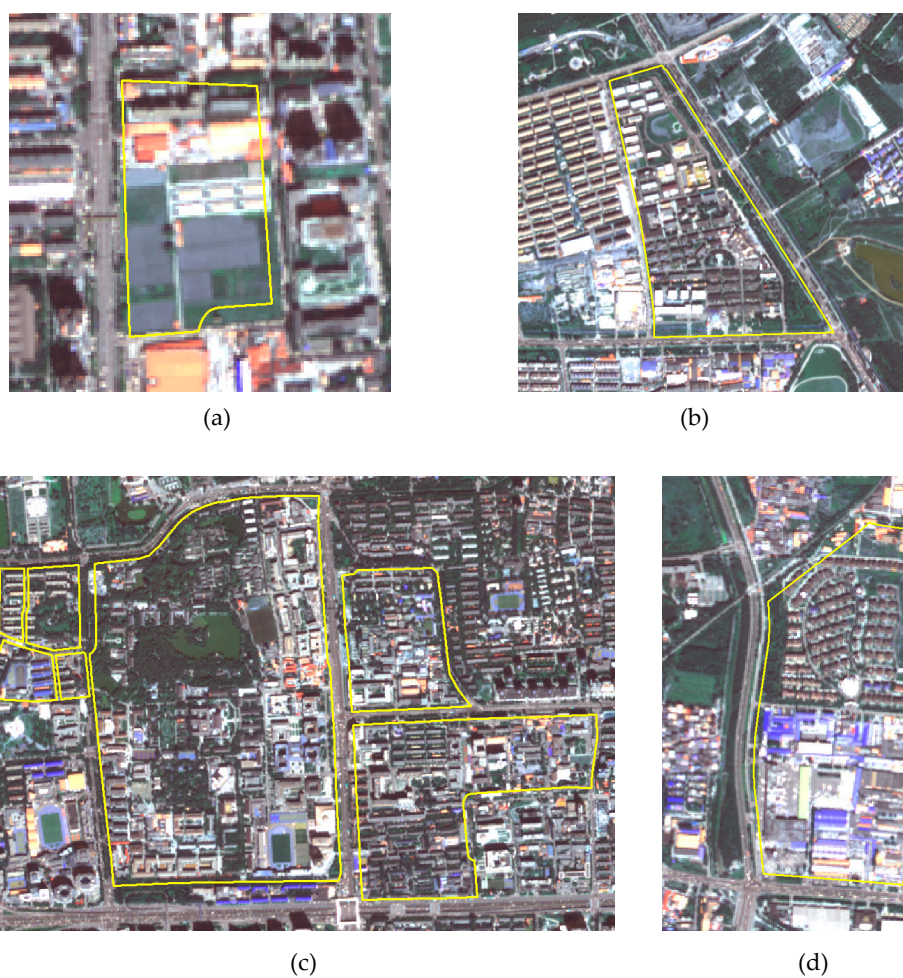

**Figure S4.** Examples of misclassified open space parcels, misclassified business parcels, over-segmentation, and under-segmentation.
