# Supplementary material
Source: MDPI journal article supplement (https://www.mdpi.com/2072-4292/9/9/865)
Supplement: s1 [file s1]

Archive with 2 entries (2 files):
- supplymentary material 1.pdf
- Baidu_POI_Haidian.zip
